# Supplementary material
Source: Springer Nature journal article supplement (https://www.springermedizin.de/resource/supplementary/12889_2013_6023_MOESM4_ESM.pdf/9494152)

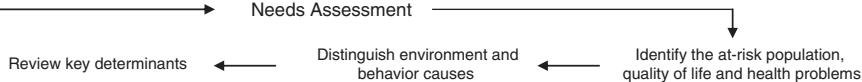

## INTERVENTION MAP

### Products

Program Objectives

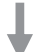

Theoretical methods

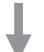

Program plan

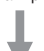

Adoption and

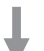

Implementation plan

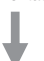

Monitoring and evaluation plan

### Tasks

*Performance objective*

*Changeable determinant*

*Target population*

*Literature review*

*Transform methods into strategies*

*Strategy into plans*

*Instruction materials*

*Pretest materials*

*Produce materials*

*Linkage system*

*Adoption and Implementation objectives*

*Adoption and Implementation determinants*

*Implementation plan*

*Evaluation model*

*Effect evaluation*

*Process evaluation*

- prevent and reduce low back pain and consequences

- physical exposure or physical exertion at work, knowledge

- nurses' aides

- participatory ergonomics (PE), physical training

(PT), cognitive behavioral training (CBT)

- workplace-adjusted integrated intervention

- facilitating specific workplace groups involving organizational and employee representatives, and researchers

- intervention protocol for PE, PT and CBT to local instructors

- to communication team

- in collaboration with the workplace

- education of local instructors

- obtaining organizational commitment

- local steering group and working group

- Integration to the organizational health system

- activities conducted as planned

- target group participation

- logistic planning of work and activities

- collaboration between organization and researchers

- focus on supervisors

- local implementation planning groups

- employee ambassador

- questionnaires, TEXT messages monthly and quarterly

- Low back pain

- consequences (work-related, leisure)

- participation in intervention activities

- reach of eligible target group

- adoption among eligible workplaces

- % delivery of activities according to a protocol

- receipt of activities

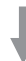

Implementation

Evaluation

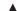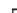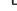

Supplement: MOESM4 [file 9494152]
